# **Automatic vegetation identification in Google Earth images using a convolutional neural network: A case study for Japanese bamboo forests**

Shuntaro Watanabe<sup>1</sup>, Kazuaki Sumi<sup>2</sup>, Takeshi Ise<sup>1,3</sup>

1. Field Science Education and Research Center (FSERC), Kyoto University, Kitashirakawaoiwake-cho, Sakyo-ku, Kyoto 606-8502, Japan
2. Graduate School of Agriculture, Kyoto University, Kitashirakawaoiwake-cho, Sakyo-ku, Kyoto 606-8502, Japan
3. PRESTO, Japan Science and Technology Agency, 7 Goban-cho, Chiyoda-ku, Tokyo 102-0076, Japan

Running head: Vegetation identification using deep learning

Author for correspondence: SW

E-mail: [sh.watanabe1006@gmail.com](mailto:sh.watanabe1006@gmail.com) (SW)

## 1 **ABSTRACT**

2 Classifying and mapping vegetation are very important tasks in environmental science  
3 and natural resource management. However, these tasks are not easy because  
4 conventional methods such as field surveys are highly labor intensive. Automatic  
5 identification of target objects from visual data is one of the most promising ways to  
6 reduce the costs for vegetation mapping. Although deep learning has become a new  
7 solution for image recognition and classification recently, in general, detection of  
8 ambiguous objects such as vegetation still is considered difficult. In this paper, we  
9 investigated the potential for adapting the chopped picture method, a recently described  
10 protocol for deep learning, to detect plant communities in Google Earth images. We  
11 selected bamboo forests as the target. We obtained Google Earth images from three  
12 regions in Japan. By applying the deep convolutional neural network, the model  
13 successfully learned the features of bamboo forests in Google Earth images, and the  
14 best trained model correctly detected 97% of the targets. Our results show that  
15 identification accuracy strongly depends on the image resolution and the quality of  
16 training data. Our results also highlight that deep learning and the chopped picture  
17 method can potentially become a powerful tool for high accuracy automated detection  
18 and mapping of vegetation.

19

## 20 **Key Words**

21 Deep learning, Convolutional neural network, Vegetation mapping, Google Earth  
22 imagery

23

## 24 INTRODUCTION

25 Classifying and mapping vegetation are essential tasks for environmental science  
26 research and natural resource management<sup>1</sup>. Traditional methods (e.g., field surveys,  
27 literature reviews, manual interpretation of aerial photographs), however, are not  
28 effective for acquiring vegetation data because they are labor intensive and often  
29 economically expensive. The technology of remote sensing offers a practical and  
30 economical means to acquire information on vegetation cover, especially over large  
31 areas<sup>2</sup>. Because of its systematic observations at various scales, remote sensing  
32 technology potentially can enable classification and mapping of vegetation at high  
33 temporal resolutions.

34 Detection of discriminating visual features is one of the most important steps in  
35 almost any computer vision problem, including in the field of remote sensing. Since  
36 conventional methods such as support vector machines<sup>3</sup> require hand-designed, time-  
37 consuming feature extraction, substantial efforts have been dedicated to development of  
38 methods for the automatic extraction of features. Recently, deep learning has become a  
39 new solution for image recognition and classification because this new method does not  
40 require the manual extraction of features.

41 Deep learning<sup>4,5</sup> is one type of machine learning technique that uses algorithms  
42 inspired by the structure and function of the brain called artificial neural networks. Deep  
43 learning involves the learning of features and classifiers simultaneously, and it uses  
44 training data to categorize image content without a priori specification of image  
45 features. Among all deep learning-based networks, the convolutional neural network  
46 (CNN) is the most popular for learning visual features in computer vision applications  
47 including remote sensing. Recent research has shown that CNN is effective for diverse

48 applications<sup>4-7</sup>. Given its success, deep learning has been used intensively in several  
49 distinct tasks for different academic and industrial fields including plant science. Recent  
50 research has shown that the deep learning technique can successfully detect plant  
51 disease, correctly classify the plant specimens in a herbarium<sup>8-10</sup>

52         Deep learning is a promising technology also in the field of remote sensing<sup>11,12</sup>.  
53 Recently, Guirado et al., (2017)<sup>13</sup> demonstrated that the deep learning technique  
54 successfully detect plant species of conservation concern and it provides better results  
55 than the conventional object detection methods. However, application of deep learning  
56 to vegetation mapping are not sufficient yet because vegetation in the aerial image often  
57 shows ambiguous and amorphous shape, and automatic object identification including  
58 deep learning tends not to work well on such objects.

59         Recently, Ise et al., (2018)<sup>14</sup> developed a method to extract relevant  
60 characteristics from ambiguous and amorphous objects. This method dissects the  
61 images into numerous small squares and efficiently produces the training images. By  
62 using this method, Ise et al. (2018)<sup>14</sup> correctly classified three moss species and “non-  
63 moss” objects in test images with an accuracy of more than 90%.

64         In this paper, we investigated the potential for adapting a deep learning model  
65 and the chopped picture method to automatic vegetation detection in Google Earth  
66 images, and bamboo forests were used as the target. In recent years, bamboo has  
67 become invasive in Japan. The bamboo species moso (*Phyllostachys edulis*) and  
68 madake (*P. bambusoides* Siebold ) are the two main types of exotic bamboo. Since the  
69 1970s, the bamboo industry in Japan had declined as a result of cheaper bamboo  
70 imports and heavy labor costs<sup>15</sup>. Consequently, many bamboo plantations were left  
71 unmanaged, which led to the eventual invasion of adjacent native vegetation<sup>16-18</sup>.

72            In this study, we specifically addressed the following questions: 1) how does the  
73 resolution of images affect the accuracy of detection; 2) how does the chopping size of  
74 training images affect the accuracy of detection; and 3) can a model that learned in one  
75 geographical location work well for a different location?

76

## 77 **MATERIALS AND METHODS**

### 78 **Target area and image acquisition**

79 In this study, we chose three regions (Sanyo-Onoda, Ide, and Isumi) in Japan to conduct  
80 the analyses (Figure 1). We used Google Earth as the source of imagery. From a given  
81 sampling location, we obtained the images at zoom levels of 1/500 (~0.13 m/pixel  
82 spatial resolution), 1/1000 (~0.26 m/pixel spatial resolution), and 1/2500 (~0.65 m/pixel  
83 spatial resolution).

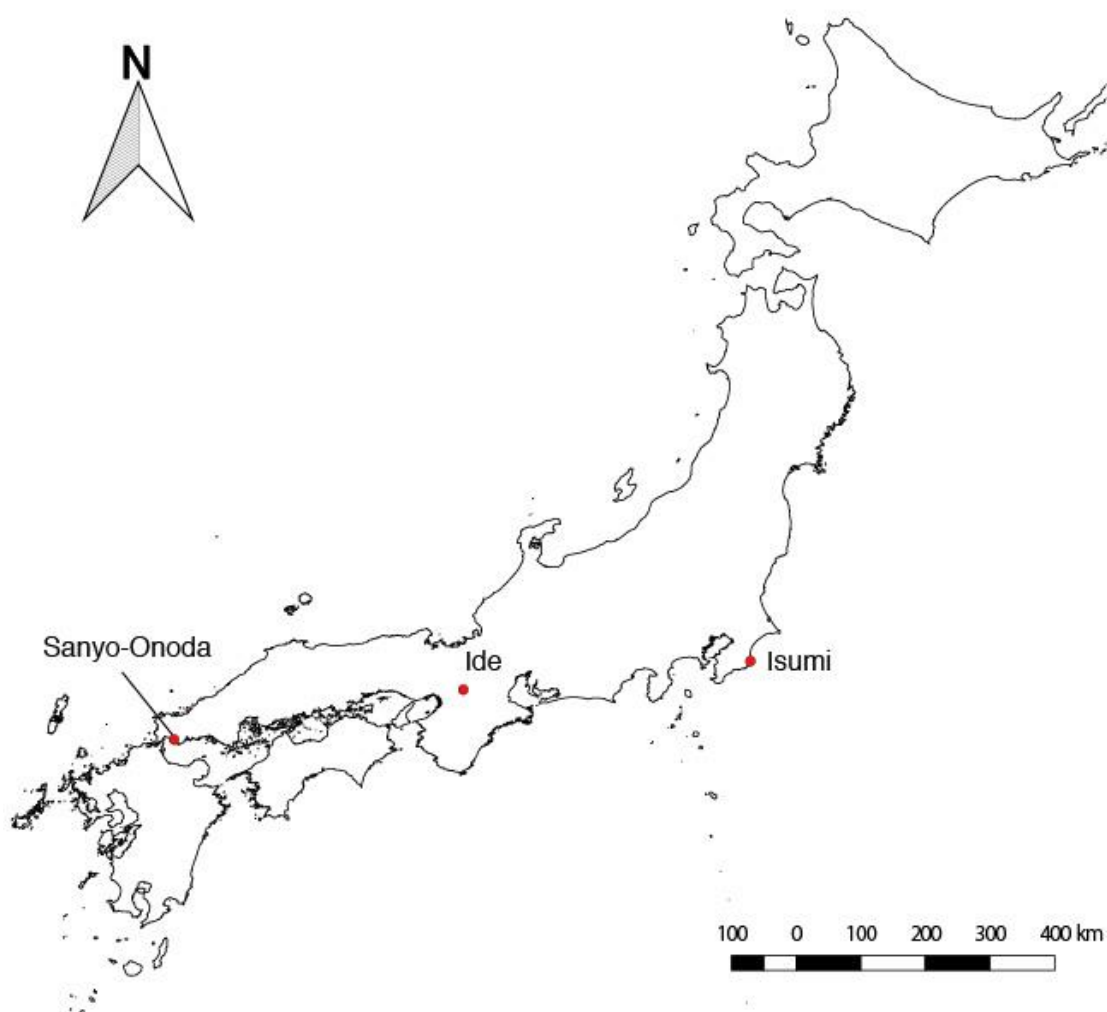

84

85 FIGURE 1 Target regions of this research.

86

## 87 **Methods and background concepts for the neural networks**

88 In this study, we employed convolutional neural networks (CNN; Figure 2). A CNN is a

89 special type of feedforward neural network that consists of a convolutional layer and

90 pooling layer.

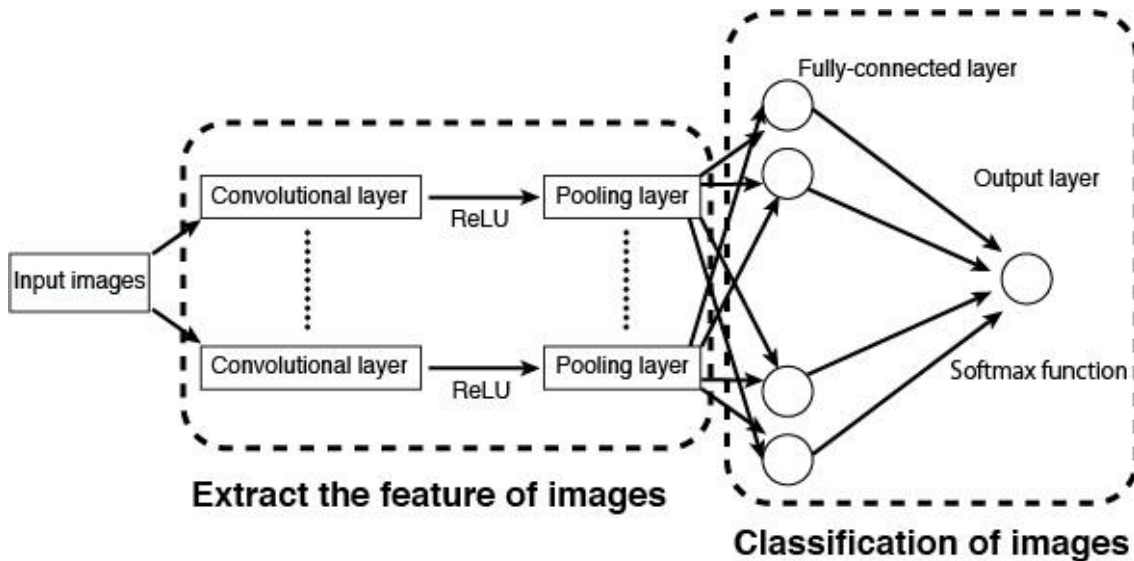

91

92 FIGURE 2 Schematic diagram of the convolutional neural networks.

93

94 A feedforward neural network is an artificial neural network wherein  
95 connections between the nodes do not form a cycle. These networks, which conduct  
96 modeling similar to the neuron activity in the brain, are generally presented as systems  
97 of interconnected processing units (artificial neurons) that can compute values from  
98 inputs leading to an output that may be used on further units. Artificial neurons are  
99 basically processing units that compute some operation over several input variables and,  
100 usually, have one output calculated through the activation function. Typically, an  
101 artificial neuron has a weight  $w_i$  that represents the degree of connection between  
102 artificial neurons, some input variables  $x_i$ , and a threshold vector  $b$ . Mathematically,  
103 the total input and output of artificial neurons can be described as follows:

104

$$105 \quad u = \sum_i w_i x_i \quad (1)$$

106

107  $z = f(u + b) = f(\sum_i w_i x_i + b)$  (2)

108

109 where  $u$ ,  $z$ ,  $x$ ,  $w$ , and  $b$  represent the total input, output, input variables, weights, and  
110 bias, respectively.  $f(\cdot)$  denotes an activation function; a nonlinear function such as a  
111 sigmoid, hyperbolic, or rectified linear function is provided in  $f(\cdot)$ . We employed a  
112 rectified linear function as the activation function, and this function is referred to as the  
113 Rectified Linear Unit (ReLU). The definition of ReLU is shown in the following  
114 equation:

115

116  $f(u) = \max\{0, u\} = \begin{cases} u & (u > 0) \\ 0 & (u \leq 0) \end{cases}$  (3)

117

118 As mentioned above, a CNN is a special type of feedforward neural network that  
119 is usually used in image classification and identification. A CNN consists of a  
120 convolutional layer and pooling layer. The convolutional layer plays a role in capturing  
121 the features from the images. In this process, a fixed-sized window runs over the image  
122 and extracts the patterns of shades of colors in the image. After each convolutional  
123 layer, there are pooling layers that are created in order to reduce the variance of  
124 features, which is accomplished by computing some operation of a particular feature  
125 over a region of the image.

126 The pooling layer has the function of reducing the position sensitivity of the  
127 feature that is extracted at the convolution layer so that the output amount of the pooling  
128 layer does not change even when the position of the feature amount extracted by the  
129 convolution layer is shifted within the image. Two operations may be realized on the



130 pooling layers, namely, max or average operations, in which the maximum or mean  
131 value is selected over the feature region, respectively. This process ensures that the  
132 same results can be obtained, even when image features have small translations or  
133 rotations, and this is very important for object classification and detection. Thus, the  
134 pooling layer is responsible for sampling the output of the convolutional one and  
135 preserving the spatial location of the image, as well as selecting the most useful features  
136 for the next layers.

137 After several convolutional and pooling layers, there are fully connected ones,  
138 which take all neurons in the previous layer and connect them to every single neuron in  
139 its layer.

140 Finally, following all of the convolution, pooling, and fully connected layers, a  
141 classifier layer may be used to calculate the class probability of each instance. We  
142 employed the softmax function in this layer. The softmax function calculates the  
143 probabilities of each target class over all possible target classes. The softmax function is  
144 written as follows:

145

$$146 \quad y_k = \text{softmax}_k(u_1, u_2, \dots, u_K) = \frac{e^{u_k}}{\sum_{j=1}^K e^{u_j}} \quad (4)$$

147

148 where  $k$  represents the number of the output unit and  $u$  represents input variables.

149 In order to evaluate the performance of the network, a loss function needs to be  
150 defined. The loss function evaluates how well the network models the training dataset.  
151 The goal of the training is to minimize the error of the loss function. Eq. (5) presents the  
152 cross entropy of the softmax function that was employed in this study:

153

154 
$$E = -\sum_{n=1}^N \sum_{k=1}^K t_{n,k} \log y_k \tag{5}$$

155

156 where  $t$  is the vector for the training data,  $K$  represents the possible class, and  $N$

157 represents the total number of instances.

158

### 159 Approach

160 A schematic diagram of our approach is shown in Figure 3. We prepared the training

161 data by using the chopped picture method<sup>14</sup>. First, in this method, we collected the

162 images that were (1) nearly 100% covered by bamboo and (2) not covered by bamboo.

163 Next, we “chopped” this picture into small squares with 50% overlap both vertically

164 and horizontally.

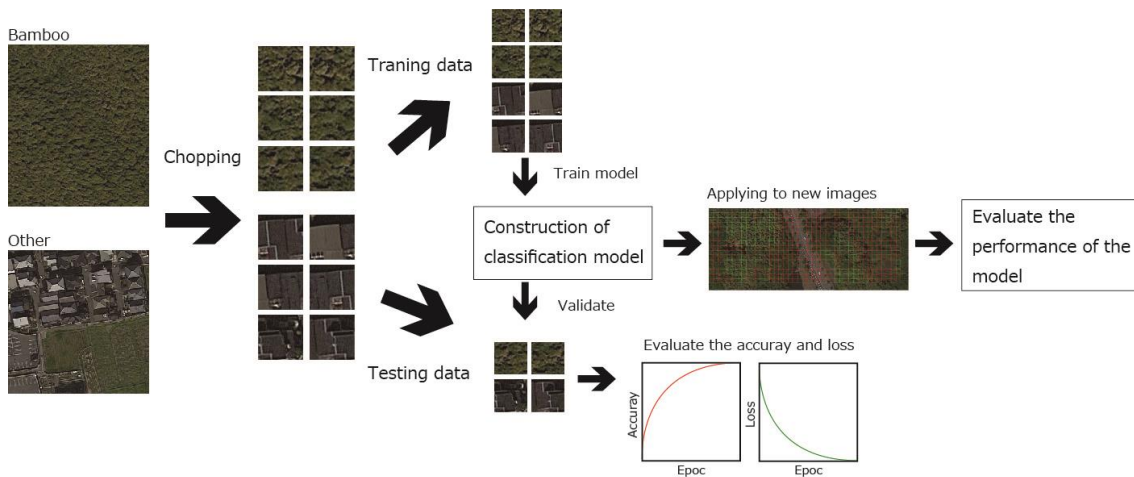

165

166 FIGURE 3 Schematic diagram of the research approach. This figure was

167 generated using data from Google Earth image (Image data: ©2018

168 CNES/Airbus & Digital Globe).

169

170           We made a model for image classification from a deep CNN for the bamboo  
171 forest detection. As opposed to traditional approaches of training classifiers with hand-  
172 designed feature extraction, the CNN learns the feature hierarchy from pixels to  
173 classifiers and trains layers jointly. We used the final layer of the CNN model for  
174 detecting the bamboo coverage from Google Earth images. To make a model for object  
175 identification, we used the deep learning framework of NVIDIA DIGITS<sup>19</sup>. We used  
176 75% of the obtained images as training data and the remaining 25% as validation data.  
177 We used the LeNet network model<sup>20</sup>. The model parameters implemented in this study  
178 included the number of training epochs (30), learning rate (0.01), train batch size (64),  
179 and validation batch size (32).

180

### 181 **Evaluation of the learning accuracy**

182 Validation of the model in each learning epoch was conducted by using the accuracy  
183 and loss function obtained from cross validation images. The accuracy indicates how  
184 accurately the model can classify the validation images. Loss represents the inaccuracy  
185 of the prediction of the model. If model learning is successful, loss (val) is low and  
186 accuracy is high. However, when loss (val) becomes high during learning, this indicates  
187 that over fitting is occurring.

188

### 189 **Evaluation of the model performance**

190 We obtained 10 new images, which were uniformly covered by bamboo forest or  
191 objects other than bamboo forest, from each study site. Next, we re-sized the images by  
192 using the chopped picture method. Third, we randomly sampled 500 images from the

193 re-sized images. Finally, we applied the model to the sampled images and evaluated the  
194 classification accuracy. To evaluate the performance of the model, we classified the  
195 classification results into the following four categories: true positive (*TP*), false positive  
196 (*FP*), false negative (*FN*), and true negative (*TN*). Next, we calculated the classification  
197 accuracy, recall rate, and precision rate by using the following equations:

198

$$199 \text{ Classification accuracy} = (TP + TN)/(TP + TN + FP + FN) \quad (6)$$

200

$$201 \text{ Recall rate} = TP/(TP + FN) \quad (7)$$

202

$$203 \text{ Precision rate} = TP/(TP + FP) \quad (8)$$

204

### 205 **Testing the effects of image resolution on the classification accuracy**

206 To quantify the effects of image resolution on the accuracy of detection, we obtained  
207 images at a zoom level of 1/500 (~0.13 m/pixel spatial resolution), 1/1000 (~0.26  
208 m/pixel spatial resolution), and 1/2500 (~0.65 m/pixel spatial resolution) from each  
209 study site. Next, we applied the chopped picture method. To adjust the spatial extent of  
210 each chopped image, we chopped 56 pixels for the 1/500 level, 28 pixels for the 1/1000  
211 level, and 14 pixels for the 1/2500 level. After constructing the model, we applied the  
212 model to the new images and calculated the classification accuracy, recall rate, and  
213 precision rate.

214

### 215 **Testing the effects of chopping grid size on the classification accuracy**

216 To quantify the effects of the spatial extent of the chopping grid on the accuracy of  
217 detection, we chopped the 1/500 images at each study site for three types of pixel sizes  
218 (84, 56, 28). After constructing the model, we applied the model to new images and  
219 calculated the classification accuracy, recall rate, and precision rate.

220

### 221 **Transferability test**

222 Given the large amount of variation in the visual appearance of bamboo forest across  
223 different cities, it is of interest to study to what extent a model learned on one  
224 geographical location can be applied to a different geographical location. As such, we  
225 performed experiments in which we trained a model for one (or more) cities, and then,  
226 we applied the model to a different set of cities. Performance of the model was  
227 evaluated by the classification accuracy, recall rate, and precision rate.

228

## 229 **RESULTS**

### 230 **Fluctuation of accuracy and loss during the learning epochs**

231 The accuracy for classifying the validation data of the final layer ranged from 94% to  
232 99%. Loss values for the validation data ranged from 0.008 to 0.214 (Figure 4). Values  
233 of accuracy increased and loss decreased following the learning epochs (Figure 4).  
234 These results suggest the all of the models were not overfit to the datasets and  
235 successfully learned the features of chopped pictures.

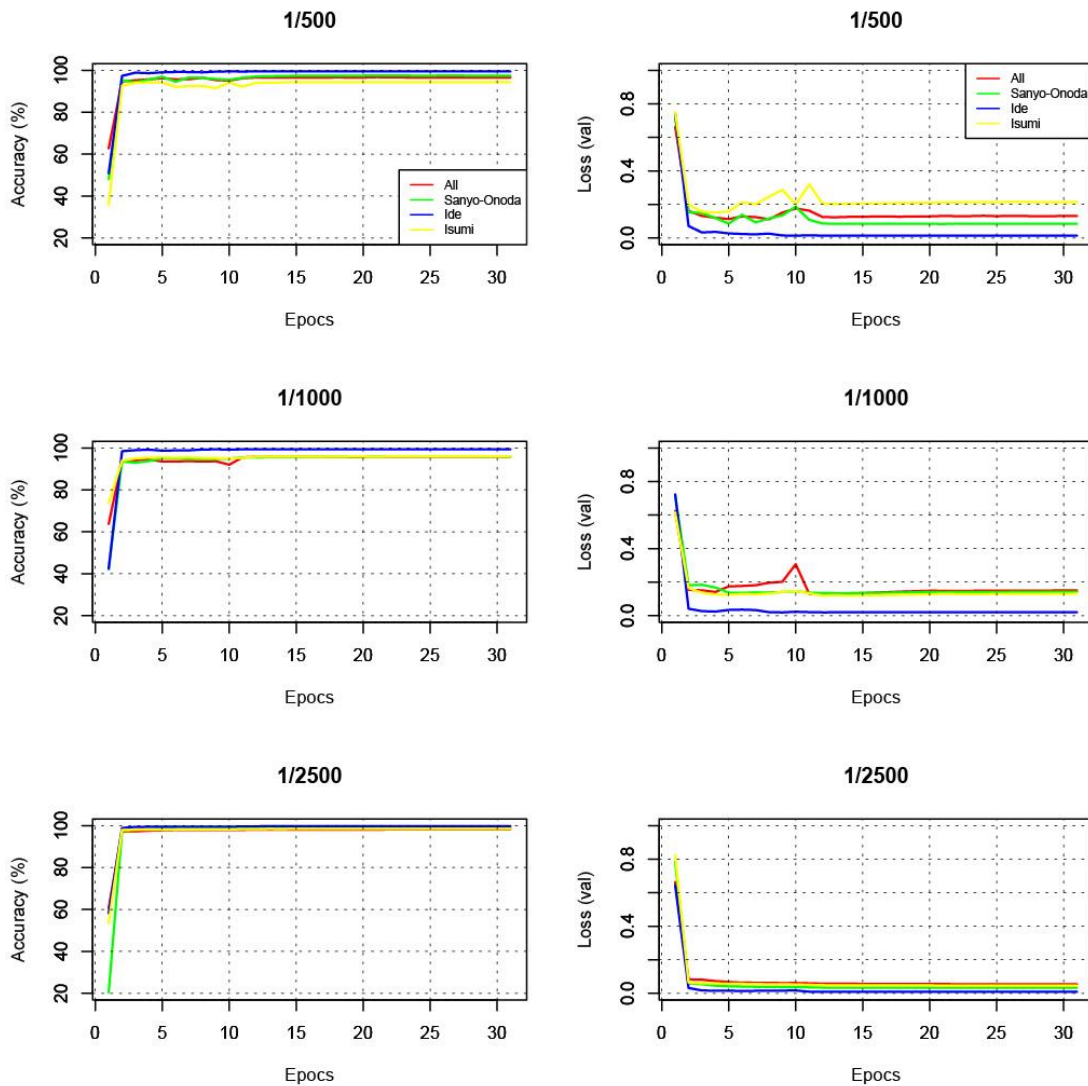

236

237 FIGURE 4 Accuracy and loss (val) of the model at each learning epoch.

238

### 239 **Effects of image resolution on the classification accuracy**

240 The classification accuracy ranged from 76% to 97% (Figure 5a). The recall rate and

241 precision rate for bamboo forest ranged 52% to 96% and 91% to 99%, respectively

242 (Figure 5b, d). The recall rate and precision rate for objects other than bamboo forest

243 ranged from 92% to 99% and 67% to 96%, respectively (Figure 5c, e). The recall rate

244 for bamboo forest declined following the decline in the image resolution, and it declined

245 dramatically when we used the 1/2500 level (~0.65 m/pixel spatial resolution) (Figure  
246 5a).

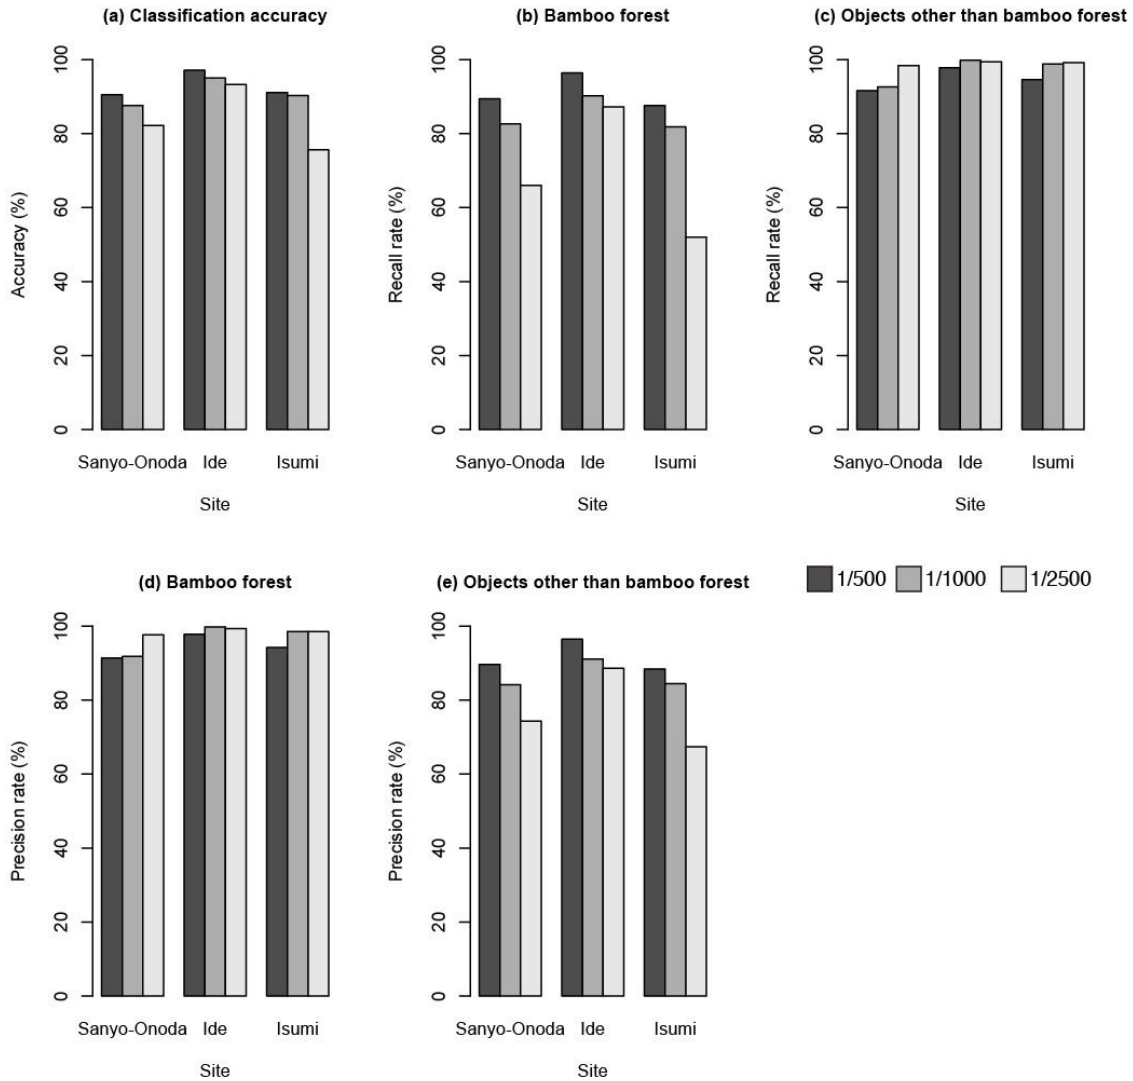

247

248 **FIGURE 5** Sensitivity of the image scale versus the test accuracy.

249

### 250 **Effects of chopping grid size on the classification accuracy**

251 The classification accuracy ranged from 85% to 96% (Figure 6a). The recall rate and  
252 precision rate for bamboo forest ranged from 79% to 99% and 89% to 98%, respectively

253 (Figure 6b, d). The recall rate and precision rate for objects other than bamboo forest

254 ranged from 88% to 98% and 79% to 99%, respectively (Figure 6c, e). The  
255 intermediate-sized images (56 pixel) showed the highest classification accuracy at all  
256 sites (Figure 6a). An example of a classification image is shown in Figure 7.

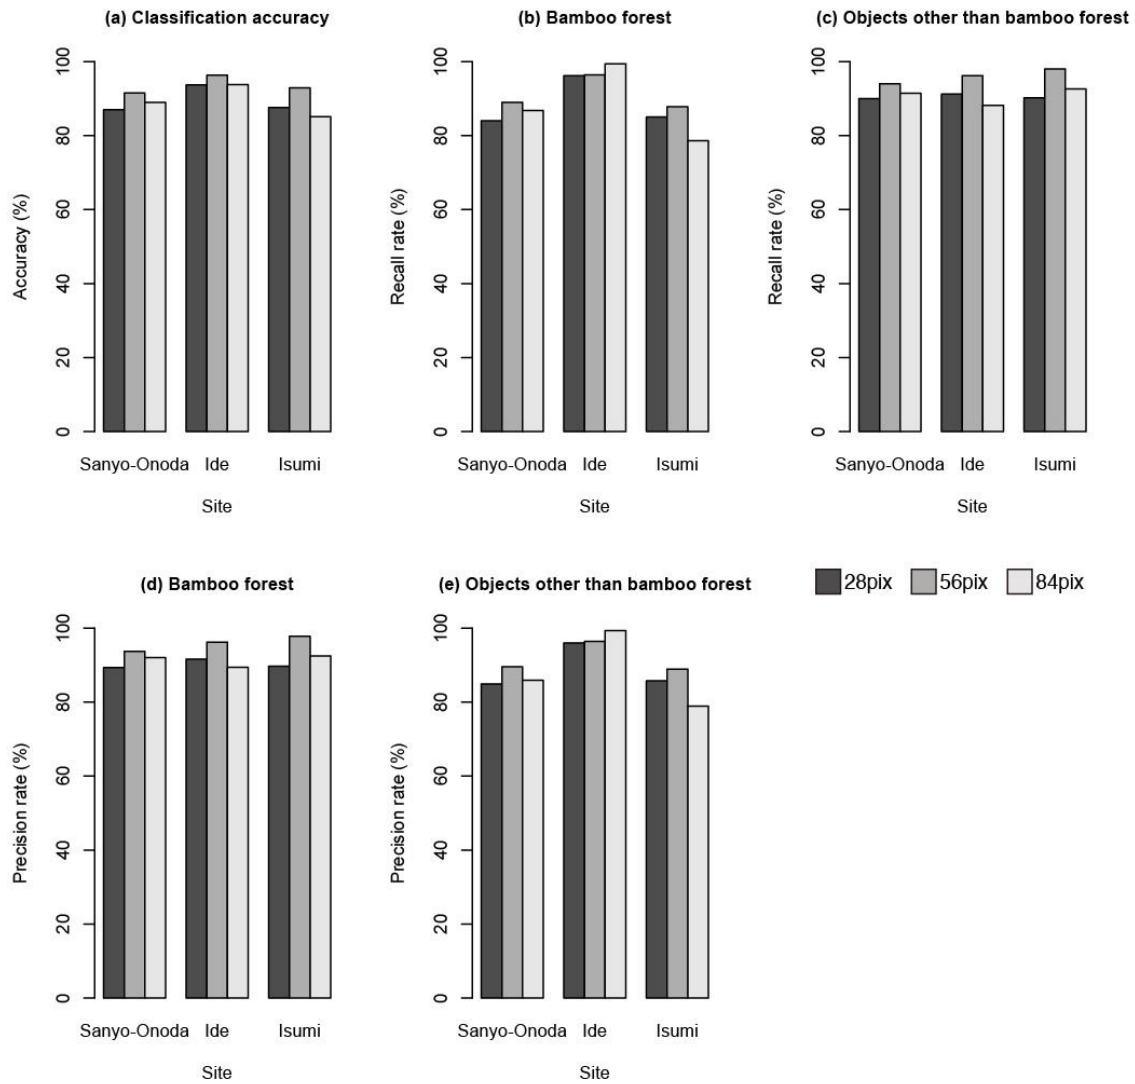

257

258 FIGURE 6 Sensitivity of the pixel size versus the test accuracy.

259

260

261

262



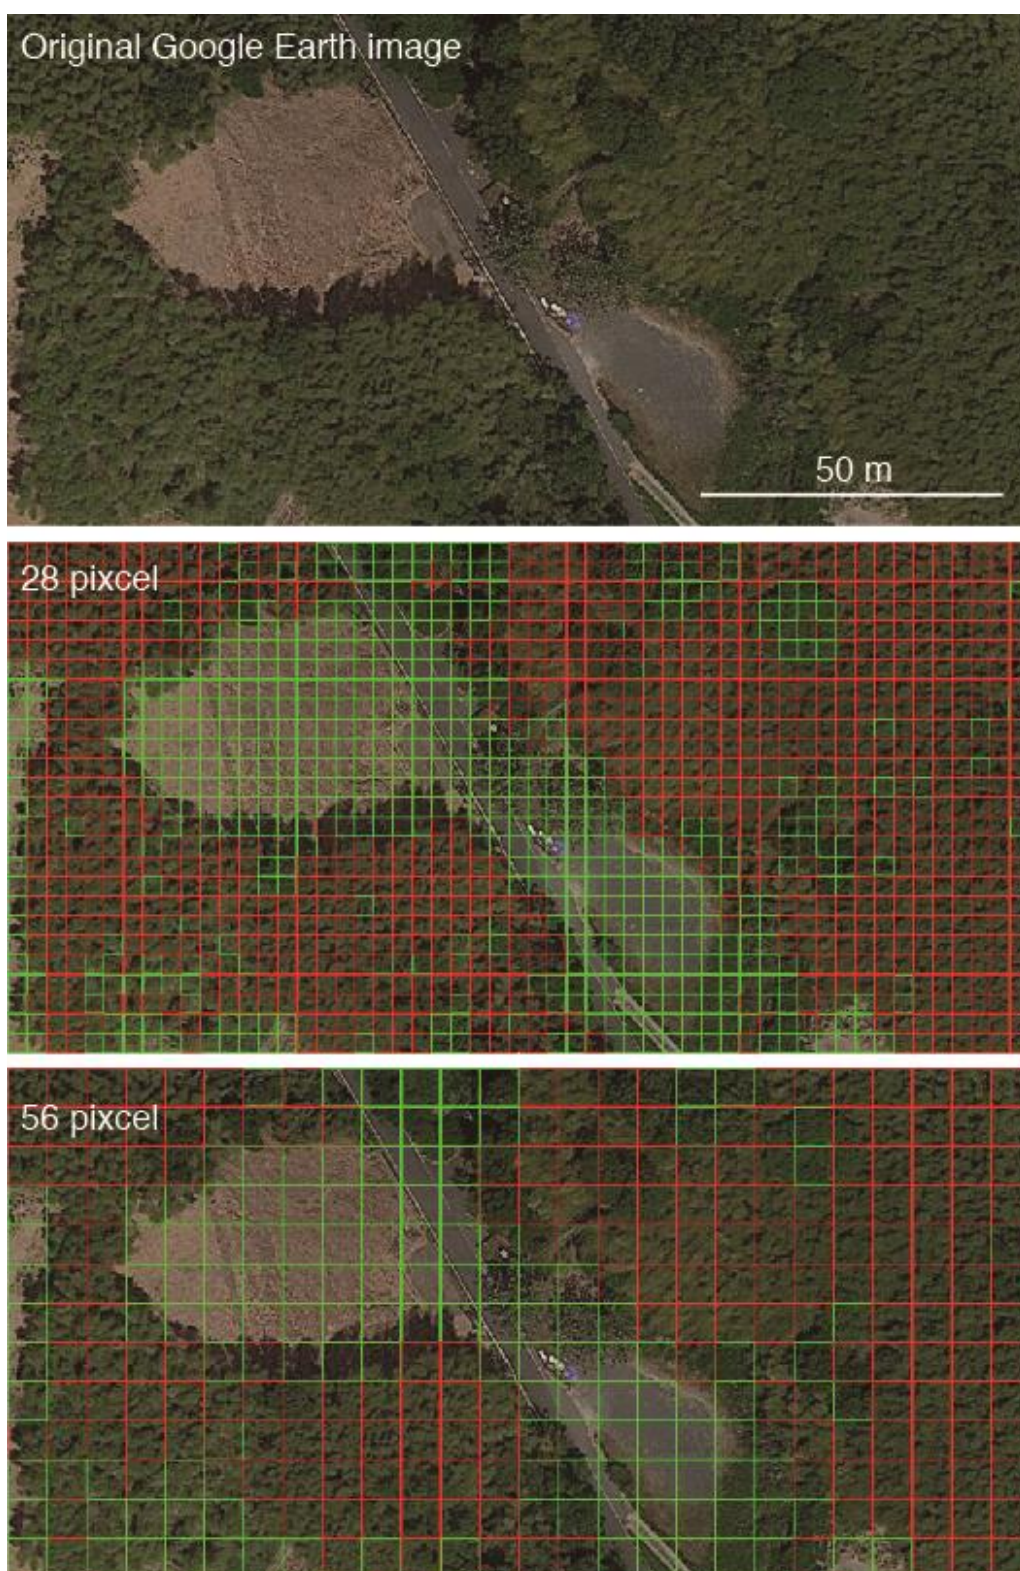

263

264 FIGURE 7 Example of a classification image. Bamboo forests are highlighted by

265 red, and objects other than bamboo are highlighted by green. This figure was

266 generated using data from Google Earth image (Image data: ©2018

267 CNES/Airbus & Digital Globe).

268

### 269 **Transferability and classification performance**

270 In general, performance was poor when training on samples from a given city and

271 testing on samples from a different city (Figure 8a). When the model that was trained by

272 the images of Isumi city was applied to the other cities, the recall rate was the worst

273 (Figure 8b). Conversely, the model that was trained by the images of Sanyo city showed

274 the highest recall rate (Figure 8b). We noticed that a more diverse set (all) did not yield

275 a better performance when applied at different locations than the models trained on

276 individual cities (Figure 8).

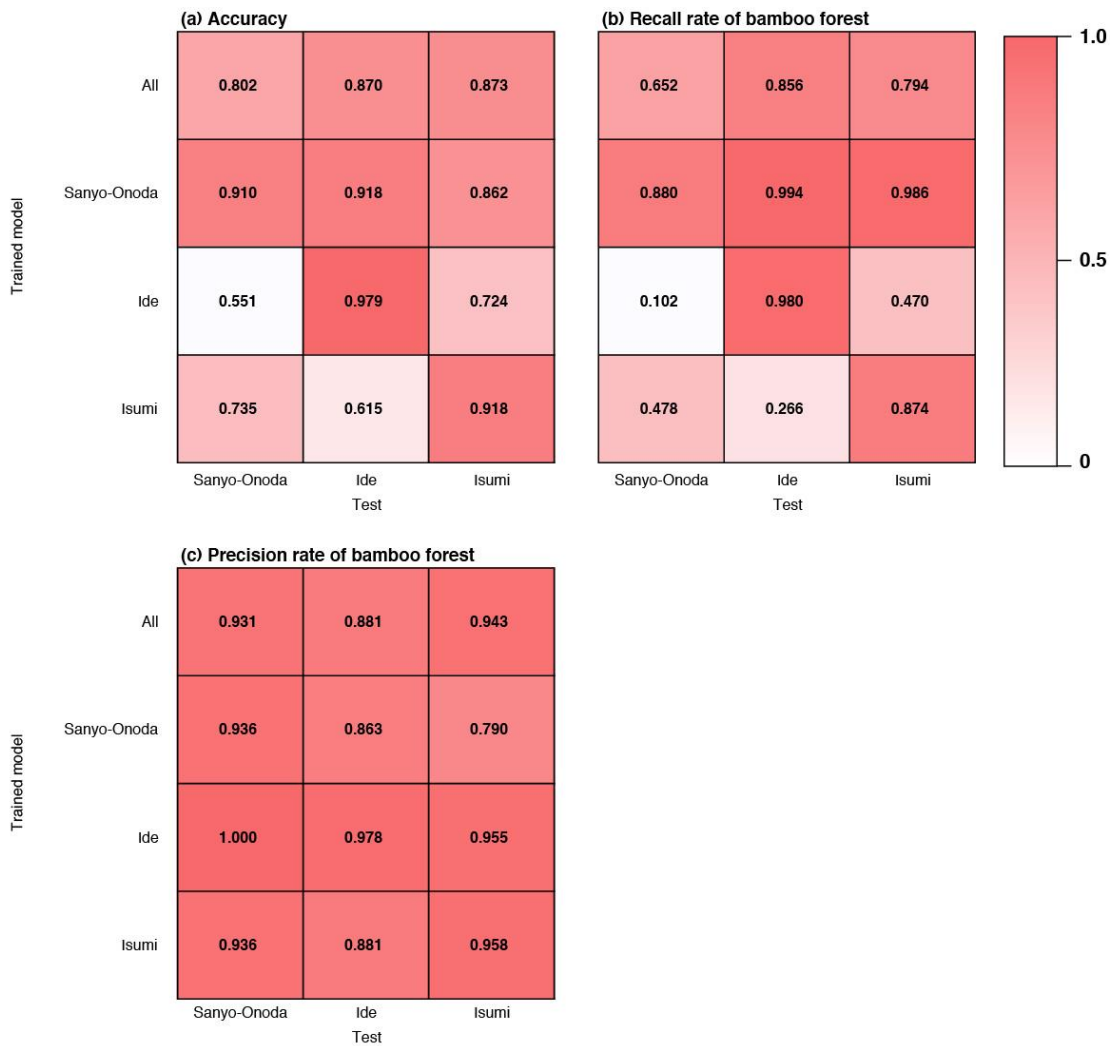

277

278 FIGURE 8 Transferability of the models learned at one location and applied at  
 279 another.

280

## 281 DISCUSSION

282 In this paper, we demonstrated that the chopped picture method and CNN could  
 283 accurately detect bamboo forest in Google Earth imagery (see Figure 7). Recent  
 284 research has shown that the deep learning technique is applicable to plant science  
 285 research<sup>8-11, 21,22</sup>; however, applications of DA in plant science have been mainly  
 286 restricted to photographs taken indoors, and applications to plants in the aerial

287 photographs are still limited<sup>11</sup>. To the best of our knowledge, this is the first study to  
288 successfully identify plant communities automatically from Google Earth imagery.

289         Classifying vegetation from remote sensing images generally suffers from  
290 several problems, e.g., it can be difficult to establish a specific pattern for each species,  
291 given the high intraclass variance, and also to distinguish between different species,  
292 given the interclass similarity of distinct species<sup>12, 23</sup>. So far, it is generally been difficult  
293 to detect ambiguous objects such as vegetation, but our results showed good  
294 performance during the detection of bamboo forest from Google Earth images by using  
295 the chopped picture method even though we employed the most classical CNN (LeNet).  
296 Our results highlight that the chopped picture method and CNN would be a powerful  
297 method for high accuracy automated bamboo forest detection and vegetation mapping  
298 (see Figure 9).

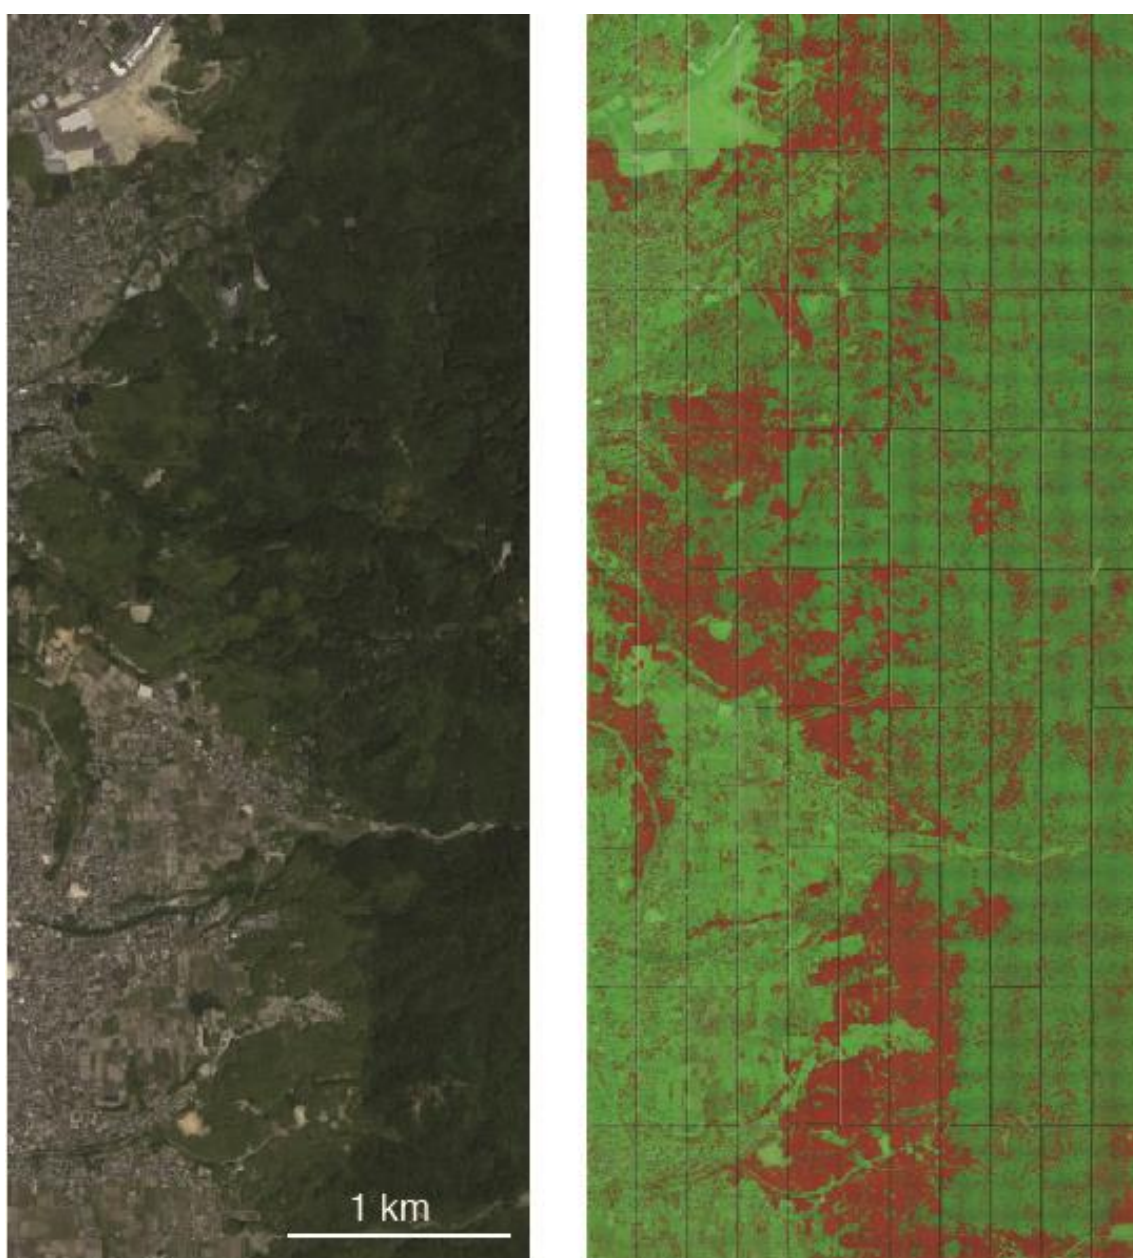

299

300 FIGURE 9 Example of applying the model to the wide area of Ide city. The left  
301 image is the original Google Earth image, and the right image shows the results  
302 of bamboo forest detection. Bamboo forests are highlighted by red, and objects  
303 other than bamboo are highlighted by green. This figure was generated using  
304 data from Google Earth image (Image data: ©2018 CNES/Airbus & Digital  
305 Globe).

306

307

### 308 **Effects of image resolution on the classification accuracy**

309 Our results indicate that the image resolution strongly affects the identification accuracy  
310 (Figure 4). As the resolution rate decreased, performance of the model also declined  
311 (Figure 4).

312 Especially in the 1/2500 imagery, the recall rate for bamboo forest of Sanyo-  
313 Onoda and Isumi city declined to 53% and 64%, respectively (Figure 4b). In contrast,  
314 the precision rate for bamboo forest increased as the resolution decreased (Figure 4d).  
315 This result means that as the resolution decreases, the model overlooks many bamboo  
316 forests; thus, when the image resolution is low, it is difficult to learn the features of the  
317 object. This result also suggests that in the deep learning model, misidentification due to  
318 false negatives is more likely to occur than misidentification due to false positive as the  
319 image resolution declines.

320

### 321 **Effects of chopping grid size on the classification accuracy**

322 Our results indicate that the chopping grid size also affects the performance of the  
323 model. The classification accuracy was the highest at the medium pixel size (56 × 56  
324 pixels; Figure 5a). In contrast to the effects of image resolution, the recall rate and  
325 precision rate for bamboo forest was also the highest at the medium pixel size except for  
326 the recall rate at Ide city (Figure 5b, d).

327 This result means that if the grid size is inappropriate, both false positives and false  
328 negatives will increase.

329           Increases of the chopping grid size will cause an increase in the number of  
330 chopped pictures in which objects other than bamboo and bamboo are mixed. In this  
331 paper, because we evaluated the performance of the model by using images that were  
332 uniformly covered by bamboo forest or objects other than bamboo forest, the effects of  
333 imagery consisting of mixed objects on the classification accuracy could not be  
334 evaluated. Evaluation of the classification accuracy for such images will take place in  
335 future research.

336

### 337 **Transferability among the models**

338 Results for the transferability tests showed that transferability was generally poor and  
339 suggest that the spatial extent of acquisition of training data strongly influences the  
340 classification accuracy (Figure 8). The model trained by Sanyo-Onoda city images  
341 yielded high recall rates for the images taken at all of the study sites, but the precision  
342 rate was lower than that of the other models (Figure 8b, c). This means that the model  
343 trained by Sanyo-Onoda city images tends to make false positive mistakes.  
344 Interestingly, transferability was not found to be related to the distance among the study  
345 sites (Figure 8). This result indicates that classification accuracy across the model  
346 reflects the conditions at the local scale such as the climate at the time when the image  
347 was taken. Additionally, even when we applied a model that learned from all training  
348 images (all), the performance of the model was not as good as when the training data  
349 were obtained within the same city. The same tendencies have been reported in studies  
350 that classified land use by using deep learning<sup>24</sup>. This may suggest that increasing the  
351 number of training data may also lead to a decrease in the identification accuracy, and it  
352 may be difficult to construct an identification model applicable to a broad area.

353

## 354 **Conclusions and future directions**

355 Our results show that the deep learning model presented here can detect bamboo forest  
356 from Google Earth images accurately. Our results also suggest that deep learning and  
357 the chopped picture method would be a powerful tool for high accuracy automated  
358 vegetation mapping and may offer great potential for reducing the effort and costs  
359 required for vegetation mapping as well as improving the current status of monitoring  
360 the distribution of bamboo. Recently, bamboo expansion has become an important  
361 problem in Japan because of its invasiveness<sup>17</sup>. While some research has analyzed the  
362 bamboo forest distribution probability on a national scale<sup>25, 26</sup>, monitoring of bamboo  
363 expansion is still a challenging problem because of labor requirements. Our approach  
364 could potentially lead to the creation of a semi or even fully automated system for the  
365 monitoring of bamboo expansion.

366 Our results also suggest that the identification accuracy depends on the image  
367 resolution and chopping grid size. Especially, the spatial resolution of training data  
368 strongly affects the model performance. Generally, satellite-based remote sensing has  
369 been widely studied and applied but suffers from insufficient information due to low  
370 resolution images or inaccurate information due to local weather conditions<sup>27</sup>. Our  
371 results also show that the performance of the model can be greatly influenced by the  
372 spatial extent of the acquired training data and a model learned on one geographical  
373 location is difficult to apply to a different geographical location. It remains a future task  
374 to develop a model that can be applied over a wide spatial scale.

375

## 376 **ACKNOWLEDGEMENTS**



377 This work was supported by JST PRESTO, Japan (Grant No. JPMJPR15O1).

378

379 **Author Contributions**

380 S. W designed the research based on discussion with T. I. S. W and K. S

381 conducted research. S. W and T. I wrote the manuscript.

382

383 **Competing interests**

384 The authors declare no competing interests.

385

386

387

## 388 REFERENCES

- 389 1. Franklin, J. *Mapping Species Distributions: Spatial Inference and Prediction*.  
390 (Cambridge University Press, 2009).
- 391 2. Xie, Y., Sha, Z., & Yu, M. Remote sensing imagery in vegetation mapping: a review.  
392 *Journal of Plant Ecology*, 1, 9–23. doi: 10.1093/jpe/rtm005 (2008).
- 393 3. Hearst, M. A., Dumais, S. T., Osuna, E., Platt, J., & Schölkopf, B. Support vector  
394 machines. *IEEE Intelligent Systems and their Applications*, 13, 18–28. doi:  
395 10.1109/5254.708428 (1998).
- 396 4. Bengio, Y. Learning deep architectures for AI. *Foundations and Trends in Machine  
397 Learning*, 2, 1–127 (2009).
- 398 5. Goodfellow, I., Bengio, Y. & Courville, A. *Deep Learning* (MIT press, 2016)
- 399 6. Karpathy, A., Toderici, G., Shetty, S., Leung, T., Sukthankar, R., & Fei-Fei, L.  
400 Large-scale video classification with convolutional neural networks. *Proceedings of  
401 the IEEE Conference on Computer Vision and Pattern Recognition* (Columbus),  
402 1725–1732 (2014).
- 403 7. Yosinski, J., Clune, J., Bengio, Y., & Lipson, H. How transferable are features in  
404 deep neural networks? *Advances in Neural Information Processing Systems*  
405 (Montreal), 3320–3328 (2014).
- 406 8. Mohanty, S. P., Hughes, D. P., & Salathé, M. Using deep learning for image-based  
407 plant disease detection. *Frontiers in Plant Science*, 7, 1419. doi:  
408 10.3389/fpls.2016.01419 (2016).
- 409 9. Ramcharan, A., Baranowski, K., McCloskey, P., Ahamed, B., Legg, J., & Hughes,  
410 D. Deep learning for image-based cassava disease detection. *Frontiers in Plant  
411 Science*, 8, 1852 (2017).

- 412 10. Carranza-Rojas, J., Goeau, H., Bonnet, P., Mata-Montero, E., & Joly, A. Going  
413 deeper in the automated identification of Herbarium specimens. *BMC Evolutionary*  
414 *Biology*, 17, 181 (2017).
- 415 11. Nogueira, K., Penatti, O. A. B., & Dos Santos, J. A. Towards better exploiting  
416 convolutional neural networks for remote sensing scene classification. *Pattern*  
417 *Recognition*, 61, 539–556 (2017).
- 418 12. Zhu, X.X., Tuia, D., Mou, L., Xia, G.S., Zhang, L., & Xu, F. Deep Learning in  
419 Remote Sensing: A Comprehensive Review and List of Resources. *IEEE Geosci.*  
420 *Remote Sens. Mag*, 5, 8–36 (2017).
- 421 13. Guirado, E., Tabik, S., Alcaraz-Segura, D., Cabello, J., & Herrera, F. Deep-learning  
422 Versus OBIA for Scattered Shrub Detection with Google Earth Imagery: Ziziphus  
423 lotus as Case Study. *Remote Sensing*, 9, 1220. doi: 10.3390/rs9121220 (2017).
- 424 14. Ise, T., Minagawa, M., & Onishi, M. Classifying 3 moss species by deep learning,  
425 using the “chopped picture” method. *Open Journal of Ecology*, 8, 166–173 (2018).
- 426 15. Nakashima, A. The present situation of the bamboo forests management in the  
427 suburbs: A case study of the bamboo shoot producing districts in the suburbs of  
428 Kyoto City. *Applied Forest Science*, 10, 1–7 (in Japanese with English abstract)  
429 (2001).
- 430 16. Nishikawa, R., Murakami, T., Yoshida, S., Mitsuda, Y., Nagashima, K., & Mizoue,  
431 N. Characteristic of temporal range shifts of bamboo stands according to adjacent  
432 landcover type. *Journal of the Japanese Forestry Society*, 87, 402–409 (in Japanese  
433 with English abstract) (2005).

- 434 17. Okutomi, K., Shinoda, S., & Fukuda, H. Causal analysis of the invasion of broad-  
435 leaved forest by bamboo in Japan. *Journal of Vegetation Science*, 7, 723–728  
436 (1996).
- 437 18. Suzuki, S. Chronological location analyses of giant bamboo (*Phyllostachys*  
438 *pubescens*) groves and their invasive expansion in a satoyama landscape area,  
439 western Japan. *Plant Species Biology*, 30, 63–71 (2015).
- 440 19. NVIDIA NVIDIA deep learning gpu training system.  
441 <https://developer.nvidia.com/digits>. Accessed June 1, 2018 (2016).
- 442 20. LeCun, Y. L., Bottou, L., Bengio, Y., & Haffner, P. Gradient-based learning applied  
443 to document recognition. *Proceedings of the IEEE*, 86, 2278–2324. doi:  
444 10.1109/5.726791 (1998).
- 445 21. Wäldchen, J., Rzanny, M., Seeland, M., & Mäder, P. Automated plant species  
446 identification—Trends and future directions. *PLoS Computational Biology*, 14(4),  
447 e1005993. <https://doi.org/10.1371/journal.pcbi.1005993> (2018).
- 448 22. Wäldchen, J., & Mäder, P. Machine learning for image based species identification.  
449 *Methods Ecol Evol*. 2018, 1–10. doi: 10.1111/2041-210X.13075 (2018).
- 450 23. Rocchini, D., Foody, G. M., Nagendra, H. et al. Uncertainty in ecosystem mapping  
451 by remote sensing. *Computers and Geosciences*, 50, 128–135 (2013).
- 452 24. Albert, A., Kaur, J., & Gonzalez, M. Using convolutional networks and satellite  
453 imagery to identify patterns in urban environments at a large scale. *arXiv preprint*,  
454 arXiv:1704.02965 (2017).
- 455 25. Someya, T., Takemura, S., Miyamoto, S., & Kamada, M. Predictions of bamboo  
456 forest distribution and associated environmental factors using natural environmental

- 457 information GIS and digital national land information in Japan. *Keikanseitaigaku*  
458 [Landscape Ecology], 15, 41–54 (in Japanese with English abstract) (2010).
- 459 26. Takano, K. T., Hibino, K., Numata, A., Oguro, M., Aiba, M., Shiogama, H.,  
460 Takayasu, I., & Nakashizuka, T. Detecting latitudinal and altitudinal expansion of  
461 invasive bamboo *Phyllostachys edulis* and *Phyllostachys bambusoides* (Poaceae) in  
462 Japan to project potential habitats under 1.5°C–4.0°C global warming. *Ecology and*  
463 *Evolution*, 7, 9848–9859 (2017).
- 464 27. Jones, H. G., & Vaughan, R. A. *Remote Sensing of Vegetation: Principles*  
465 *Techniques and Applications* (Oxford University Press, 2010).
- 466
- 467
- 468
- 469
- 470
- 471
- 472
- 473
- 474
